# Supplementary material for: Unraveling a Lignocellulose-Decomposing Bacterial Consortium from Soil Associated with Dry Sugarcane Straw by Genomic-Centered Metagenomics
Source: MDPI journal article supplement (doi:10.3390/microorganisms9050995), 2021-05-05
Supplement: s1 [file s1]

**Table S2.** Sequencing and assembly of the lignocellulose-decomposing bacterial community.

|                                 | <b>Raw Reads</b> | <b>Reads after trimming</b> | <b>Assembled size (bp)</b> | <b>N50 (Kb) / L50</b> | <b>Longest scaffold (bp)</b> | <b>Scaffolds &gt; 300bp</b> |
|---------------------------------|------------------|-----------------------------|----------------------------|-----------------------|------------------------------|-----------------------------|
| Free: 2 <sup>nd</sup> week      | 53,311,191       | 36,795,258                  | 216,621,114                | 6,524 / 3,706         | 1,251,422                    | 141,395                     |
| Attached: 2 <sup>nd</sup> week  | 50,362,156       | 40,708,747                  | 205,005,671                | 7,330 / 2,355         | 1,557,200                    | 133,028                     |
| Free: 20 <sup>th</sup> week     | 50,849,621       | 35,056,982                  | 198,735,922                | 3,227 / 7,520         | 1,211,013                    | 156,975                     |
| Attached: 20 <sup>th</sup> week | 58,663,806       | 36,039,348                  | 207,655,023                | 3,510 / 7,599         | 479,265                      | 161,807                     |
| All (megahit)                   | 213,186,774      | 148,600,335                 | 374,211,453                | 12,854 / 3,318        | 1,904,463                    | 127,034                     |
