# Supplementary material for: Unraveling a Lignocellulose-Decomposing Bacterial Consortium from Soil Associated with Dry Sugarcane Straw by Genomic-Centered Metagenomics
Source: MDPI journal article supplement (doi:10.3390/microorganisms9050995), 2021-05-05
Supplement: s1 [file s1]

**Table S4.** The number of domains for each MAG found in the consortium. (continue)

| <b>Bin</b> | <b>GH</b> | <b>GT</b> | <b>CE</b> | <b>CBM</b> | <b>AA</b> |
|------------|-----------|-----------|-----------|------------|-----------|
| 01         | 463       | 209       | 129       | 14         | 77        |
| 02         | 662       | 323       | 209       | 78         | 75        |
| 03         | 106       | 77        | 53        | 17         | 39        |
| 04         | 319       | 156       | 158       | 8          | 76        |
| 05         | 288       | 183       | 154       | 6          | 48        |
| 06         | 441       | 179       | 102       | 11         | 46        |
| 07         | 381       | 245       | 163       | 29         | 54        |
| 08         | 115       | 112       | 180       | 2          | 67        |
| 09         | 448       | 444       | 93        | 95         | 61        |
| 10         | 161       | 155       | 77        | 8          | 52        |
| 11         | 680       | 194       | 122       | 49         | 33        |
| 12         | 173       | 189       | 127       | 17         | 70        |
| 13         | 825       | 281       | 147       | 68         | 51        |
| 14         | 45        | 132       | 98        | 6          | 75        |
| 15         | 92        | 122       | 66        | 8          | 27        |
| 16         | 100       | 285       | 125       | 32         | 45        |
| 17         | 176       | 171       | 86        | 8          | 89        |
| 18         | 265       | 201       | 149       | 12         | 137       |
| 19         | 883       | 202       | 133       | 57         | 33        |
| 20         | 297       | 120       | 102       | 23         | 54        |
| 21         | 235       | 124       | 76        | 8          | 83        |
| 22         | 500       | 162       | 99        | 12         | 45        |

**Table S4.** The number of domains for each MAG found in the consortium. (continue)

| <b>Bin</b> | <b>GH</b> | <b>GT</b> | <b>CE</b> | <b>CBM</b> | <b>AA</b> |
|------------|-----------|-----------|-----------|------------|-----------|
| 23         | 668       | 370       | 162       | 65         | 53        |
| 24         | 141       | 156       | 144       | 9          | 134       |
| 25         | 499       | 277       | 145       | 68         | 55        |
| 26         | 888       | 179       | 126       | 42         | 39        |
| 27         | 89        | 109       | 101       | 5          | 68        |
| 28         | 721       | 407       | 223       | 95         | 83        |
| 29         | 896       | 247       | 152       | 90         | 50        |
| 30         | 120       | 119       | 49        | 8          | 41        |
| 31         | 845       | 282       | 147       | 52         | 47        |
| 32         | 319       | 130       | 115       | 12         | 55        |
| 33         | 885       | 275       | 205       | 111        | 51        |
| 34         | 161       | 100       | 99        | 7          | 52        |
| 35         | 159       | 150       | 77        | 13         | 53        |
| 36         | 663       | 153       | 100       | 41         | 60        |
| 37         | 575       | 163       | 101       | 59         | 45        |
| 38         | 244       | 243       | 150       | 22         | 29        |
| 39         | 542       | 234       | 93        | 69         | 68        |
| 40         | 385       | 135       | 133       | 12         | 77        |
| 41         | 1174      | 311       | 238       | 100        | 41        |
| 42         | 184       | 169       | 104       | 10         | 119       |
| 43         | 574       | 160       | 210       | 17         | 71        |
| 44         | 55        | 107       | 82        | 4          | 60        |

**Table S4.** The number of domains for each MAG found in the consortium. (end)

| <b>Bin</b> | <b>GH</b> | <b>GT</b> | <b>CE</b> | <b>CBM</b> | <b>AA</b> |
|------------|-----------|-----------|-----------|------------|-----------|
| 45         | 136       | 250       | 112       | 24         | 64        |
| 46         | 177       | 315       | 78        | 49         | 80        |
| 47         | 179       | 179       | 142       | 12         | 105       |
| 48         | 30        | 73        | 83        | 7          | 55        |
| 49         | 151       | 161       | 107       | 5          | 68        |
| 50         | 554       | 189       | 149       | 10         | 56        |
| 51         | 251       | 117       | 108       | 7          | 99        |
| 52         | 137       | 47        | 88        | 4          | 43        |
