# Supplementary material for: Unraveling a Lignocellulose-Decomposing Bacterial Consortium from Soil Associated with Dry Sugarcane Straw by Genomic-Centered Metagenomics
Source: Microorganisms. 2021 May 5;9(5):995. doi: 10.3390/microorganisms9050995 (PMC8170896; doi:10.3390/microorganisms9050995)
Supplement: Supplementary file 1 [file microorganisms-09-00995-s001.zip › microorganisms-1173787-supplementary/TableS1.xlsx]

## Sheet: artigo
Table S1. Mass Balance Raw Data
		Mass fraction of cellulose in bagasse	Concentration of dry bagasse	Glucose concentration			Glucose concentration before concentration	Yield
Sample	Cellulose	XG0	CIS0	Cg	Cg	Cg	Cg (medium)	Yg
	%		mg/ml	umol/ml	ug/ml	mg/ml	mg/ml	%
2° T0 -1	43.1	0.431	9	344.615	62030.8	62.0308	4.13539
2° T0 -2	43.77	0.4377	9	362.923	65326.2	65.3262	4.35508
2° T0 -3	43.95	0.4395	9	317.724	57190.4	57.1904	3.81269
20°T0 -1	37.16	0.3716	9	123.387	22209.7	22.2097	1.48064
20°T0 -2	33.93	0.3393	9	83.6178	15051.2	15.0512	1.00341
20°T0 -3	34.4	0.344	9	113.449	20420.8	20.4208	1.36139				XGO = Mass fraction of cellulose in bagasse
Mean	39.385	0.39385	9	224.286	40371.5	40.3715	2.69143	0			CISO = Concentration of dry bagasse
											Cg 1 = Measured glucose concentration
2° T7 -1	31.34	0.3134	9	458.091	82456.4	82.4564	5.49709				Cg2 = Glucose concentration in the culture medium
2° T7 -2	31.65	0.3165	9	482.878	86918.1	86.9181	5.79454				Yg = Yield
2° T7 -3	31.73	0.3173	9	475.784	85641	85.641	5.7094
Mean	31.5733	0.315733	9	472.251	85005.2	85.0052	5.66701	0.756267
20°T7 -1	32.99	0.3299	9	105.079	18914.1	18.9141	1.26094				Formula:
20°T7 -2	31.88	0.3188	9	114.023	20524.2	20.5242	1.36828
20°T7 -3	32.71	0.3271	9	92.5549	16659.9	16.6599	1.11066
Mean	32.5267	0.325267	9	103.886	18699.4	18.6994	1.24663	-0.367209
											ZHU, Y.; MALTEN, M.; TORRY-SMITH, M.; MCMILLAN, J. D.; STICKEL, J. J. Calculating sugar yields in high solids hydrolysis of biomass. Bioresource Technology, v. 102, p. 2897-2903, 2011 https://doi.org/10.1016/j.biortech.2010.10.134
