# Supplementary material for: Unraveling a Lignocellulose-Decomposing Bacterial Consortium from Soil Associated with Dry Sugarcane Straw by Genomic-Centered Metagenomics
Source: Microorganisms. 2021 May 5;9(5):995. doi: 10.3390/microorganisms9050995 (PMC8170896; doi:10.3390/microorganisms9050995)
Supplement: Supplementary file 1 [file microorganisms-09-00995-s001.zip › microorganisms-1173787-supplementary/TableS3.xlsx]

## Sheet: MetaWRAP
Bin	F., 2nd	F., 20th	A., 2nd	A., 20th	Phylum	Class	Order	Family	Closest taxon (GTDBtk)	Closest taxon (Kraken)	Kraken %	Compl.(%)	Cont.(%)	Scaff.	N50	Size
1	X	X	X	X	Proteobacteria	Alphaproteobacteria	Sphingomonadales	Sphingomonadaceae	Novosphingobium sp.	Novosphingobium sp.	75	91.26	1.62	44	215778	4841739
2	X	X	X	X	Bacteroidetes	Bacteroidia	Chitinophagales	Chitinophagaceae	Chitinophaga sp.	Chitinophaga sp.	60.87	100	1.15	23	817786	7940272
3	X	--	X	--	Actinobacteria	Actinobacteria	Actinomycetales	Micrococcaceae	Arthrobacter sp.	Micrococcaceae	56.22	61.76	1.16	852	3299	2297904
4	X	X	X	X	Proteobacteria	Alphaproteobacteria	Caulobacterales	Caulobacteraceae	Caulobacter sp.	Caulobacter sp.	56.29	93.69	4.33	167	213375	4928801
5	X	X	X	X	Proteobacteria	Alphaproteobacteria	Sphingomonadales	Sphingomonadaceae	Sphingomonas sp.	Sphingomonas sp.	100	96.4	0.85	38	223715	4163301
6	X	X	X	X	Proteobacteria	Gammaproteobacteria	Xanthomonadales	Xanthomonadaceae	Pseudoxanthomonas sp.	Pseudoxanthomonas sp.	63.82	88.26	0.34	246	49426	3613034
7	X	X	X	X	Bacteroidetes	Bacteroidia	Flavobacteriales	Weeksellaceae	Chryseobacterium sp.	Chryseobacterium sp.	90.91	100	0	22	770808	5162373
8	X	X	X	X	Proteobacteria	Alphaproteobacteria	Sphingomonadales	Sphingomonadaceae	Sphingopyxis sp.	Sphingopyxis sp.	66.67	93.38	3.18	141	88516	4252535
9	X	X	X	X	Bacteroidetes	Cytophagia	Cytophagales	Cytophagaceae	Sporocytophaga sp.	Cytophagia sp.	10.94	100	1.19	64	334426	6632112
10	X	X	X	X	Proteobacteria	Alphaproteobacteria	Sphingomonadales	Sphingomonadaceae	Sphingobium sp.	Sphingobium sp.	56.91	73.61	0.09	123	57144	3014415
11	X	X	X	X	Bacteroidetes	Bacteroidia	Chitinophagales	Chitinophagaceae	Flavisolibacter sp.	Bacteroidia sp.	54.23	79.5	0.57	721	7812	3946228
12	X	X	X	X	Proteobacteria	Gammaproteobacteria	Burkholderiales	Burkholderiaceae	Mitsuaria chitosanitabida	Mitsuaria sp.	90	99.22	1.23	40	201288	5853077
13	X	X	X	X	Bacteroidetes	Bacteroidia	Sphingobacteriales	Sphingobacteriaceae	Sphingobacteriaceae bacterium GW460-11-11-14-LB5	Sphingobacteriaceae	87.1	97.61	0.51	31	471170	5831202
14	X	X	X	X	Proteobacteria	Gammaproteobacteria	Burkholderiales	Burkholderiaceae	Acidovorax sp.	Acidovorax sp.	91.3	99.81	1.24	23	411193	4761690
15	X	X	X	X	Bdellovibrionota	Bdellovibrionia	Bdellovibrionales	Bdellovibrionaceae	Bdellovibrio sp.	Bdellovibrio bacteriovorus	60.2	83.06	0.9	505	10261	3540359
16	X	X	X	X	Proteobacteria	Gammaproteobacteria	Xanthomonadales	Rhodanobacteraceae	Dokdonella sp.	Dokdonella koreensis	83.33	99.37	1.99	18	559764	4843315
17	X	X	X	X	Proteobacteria	Alphaproteobacteria	Rhizobiales	Rhizobiaceae	Agrobacterium tumefaciens	Agrobacterium tumefaciens	100	99.53	0.55	26	576092	4941267
18	X	X	X	X	Proteobacteria	Gammaproteobacteria	Burkholderiales	Burkholderiaceae	Variovorax sp.	Variovorax sp.	99.15	89.72	6.49	118	92476	6007252
19	X	X	X	X	Bacteroidetes	Bacteroidia	Chitinophagales	Chitinophagaceae	Chitinophagaceae	Bacteroidetes	36.69	64.93	1.27	1390	3694	4340376
20	X	X	X	X	Actinobacteria	Actinobacteria	Actinomycetales	Microbacteriaceae	Microbacterium sp.	Microbacterium sp.	84.11	76.7	2.48	214	23019	3141805
21	X	X	X	X	Proteobacteria	Alphaproteobacteria	Rhizobiales	Rhizobiaceae	Shinella sp.	Rhizobiaceae	91.48	52.59	2.59	352	14994	3686717
22	X	X	X	X	Proteobacteria	Alphaproteobacteria	Sphingomonadales	Sphingomonadaceae	Sphingomonas sp.	Sphingomonas sp.	100	99.17	1.11	8	1058682	3922504
23	X	X	X	X	Bacteroidetes	Cytophagia	Cytophagales	Spirosomaceae	Siphonobacter aquaeclarae	FCB Group sp.	36.48	92.15	1.05	1028	7330	5469544
24	X	X	X	X	Proteobacteria	Gammaproteobacteria	Burkholderiales	Burkholderiaceae	Pseudacidovorax sp.	Burkholderiales	97.69	70.36	1.81	606	13771	5489212
25	X	X	X	X	Bacteroidetes	Bacteroidia	Chitinophagales	Chitinophagaceae	Chitinophagaceae	Chitinophagaceae	42.48	87.67	2.11	638	13788	5986324
26	X	X	X	X	Bacteroidetes	Bacteroidia	Chitinophagales	Chitinophagaceae	Niabella sp.	Niabella soli	87.55	95.23	0.5	241	31344	4572513
27	X	X	X	X	Proteobacteria	Alphaproteobacteria	Sphingomonadales	Sphingomonadaceae	Novosphingobium sp.	Sphingomonadales	100	97.69	0.97	18	322993	3529383
28	X	X	X	X	Bacteroidetes	Cytophagia	Cytophagales	Spirosomaceae	Dyadobacter sp.	Dyadobacter fermentans	88.24	99.7	0.6	17	972536	7826826
29	X	X	X	X	Bacteroidetes	Bacteroidia	Chitinophagales	Chitinophagaceae	Niabella sp.	FCB Group sp.	57.89	100	0.66	76	356462	6316793
30	X	X	X	X	Actinobacteria	Actinobacteria	Actinomycetales	Microbacteriaceae	Microbacteriaceae	Microbacteriaceae	81.66	71.44	1.77	289	9615	2059590
31	X	X	X	X	Bacteroidetes	Bacteroidia	Flavobacteriales	Flavobacteriaceae	Flavobacterium sp.	Flavobacterium sp.	83.33	99.65	0.4	18	1285462	5514676
32	X	X	X	X	Proteobacteria	Alphaproteobacteria	Rhizobiales	Devosiaceae	Devosia sp.	Devosia sp.	92.86	99.19	0.2	14	365123	4412235
33	X	X	X	X	Firmicutes	Bacilli	Paenibacillales	Paenibacillaceae	Paenibacillaceae	Paenibacillus sp.	56.62	92.74	2.5	461	28044	8180064
34	X	X	X	X	Proteobacteria	Alphaproteobacteria	Sphingomonadales	Sphingomonadaceae	Sphingobium sp.	Sphingomonadaceae	56.06	78.37	9.73	66	300094	3137218
35	X	X	X	X	Proteobacteria	Alphaproteobacteria	Sphingomonadales	Sphingomonadaceae	Sphingobium sp.	Sphingobium sp.	53.49	88.59	5.27	86	146196	3371965
36	X	X	X	X	Firmicutes	Bacilli	Paenibacillales	Paenibacillaceae	Cohnella sp.	Paenibacillaceae	52.6	83.46	8.9	1114	5418	4468037
37	X	--	X	--	Actinobacteria	Actinobacteria	Actinomycetales	Cellulomonadaceae	Cellulomonas iranensis	Cellulomonas sp.	78.71	94.7	0.96	202	42736	3729899
38	X	--	X	--	Bacteroidetes	Bacteroidia	Chitinophagales	Chitinophagaceae	Chitinophagaceae	Bacteroidia sp.	39.17	74.88	4.93	1103	3533	3330359
39	X	X	X	X	Actinobacteria	Actinobacteria	Actinomycetales	Cellulomonadaceae	Cellulomonas sp.	Cellulomonas sp.	64.03	93.11	0.58	139	120147	4301452
40	X	X	X	X	Proteobacteria	Alphaproteobacteria	Caulobacterales	Caulobacteraceae	Caulobacter sp.	Caulobacter sp.	79.66	87.85	0.92	290	35555	4300618
41	X	X	X	X	Bacteroidetes	Bacteroidia	Chitinophagales	Chitinophagaceae	Niastella sp.	Chitinophagaceae	89.95	94.95	0.49	172	72074	7632723
42	X	X	X	X	Proteobacteria	Gammaproteobacteria	Pseudomonadales	Pseudomonadaceae	Pseudomonas sp.	Pseudomonas putida	98.65	99.61	0.13	74	124470	5639801
43	X	X	X	X	Proteobacteria	Alphaproteobacteria	Caulobacterales	Caulobacteraceae	Caulobacter sp.	Caulobacter sp.	50	96.19	2.82	170	269066	5344511
44	X	X	X	X	Proteobacteria	Gammaproteobacteria	Burkholderiales	Burkholderiaceae	Herbaspirillum sp.	Herbaspirillum robiniae	100	99.07	0.1	12	634595	4320850
45	X	X	X	X	Actinobacteria	Thermoleophilia	Solirubrobacterales	Solirubrobacteraceae	Solirubrobacteraceae	Actinobacteria	67.14	93.85	1	140	52223	4104691
46	X	X	X	X	Actinobacteria	Actinobacteria	Unknown	Unknown	Bacteria	Bacteria sp.	88.24	92.31	3.42	34	459146	4281017
47	X	X	X	X	Actinobacteria	Actinobacteria	Propionibacteriales	Nocardioidaceae	Nocardioidaceae	Nocardioides sp.	80	99.48	0	15	1110375	4757382
48	X	X	X	X	Proteobacteria	Gammaproteobacteria	Pseudomonadales	Moraxellaceae	Acinetobacter oleivorans	Acinetobacter oleivorans	68.92	81.77	3.11	785	5218	3027271
49	X	X	X	X	Proteobacteria	Alphaproteobacteria	Sphingomonadales	Sphingomonadaceae	Porphyrobacter sp.	Sphingomonadales	94.12	99.42	7.61	17	424016	3651235
50	X	X	X	X	Proteobacteria	Alphaproteobacteria	Sphingomonadales	Sphingomonadaceae	Sphingobium yanoikuyae	Sphingobium yanoikuyae	83.22	73.57	1.71	429	13754	3761729
51	X	X	X	X	Proteobacteria	Gammaproteobacteria	Burkholderiales	Burkholderiaceae	Variovorax sp.	Variovorax sp.	86.92	50.5	0	107	69134	4085608
52	X	X	X	X	Proteobacteria	Alphaproteobacteria	Sphingomonadales	Sphingomonadaceae	Novosphingobium sp.	Sphingomonadaceae	74.42	62.7	0	43	170560	2360576
