# Supplementary figures and images for: Unraveling a Lignocellulose-Decomposing Bacterial Consortium from Soil Associated with Dry Sugarcane Straw by Genomic-Centered Metagenomics
Source: MDPI journal article supplement (doi:10.3390/microorganisms9050995), 2021-05-05

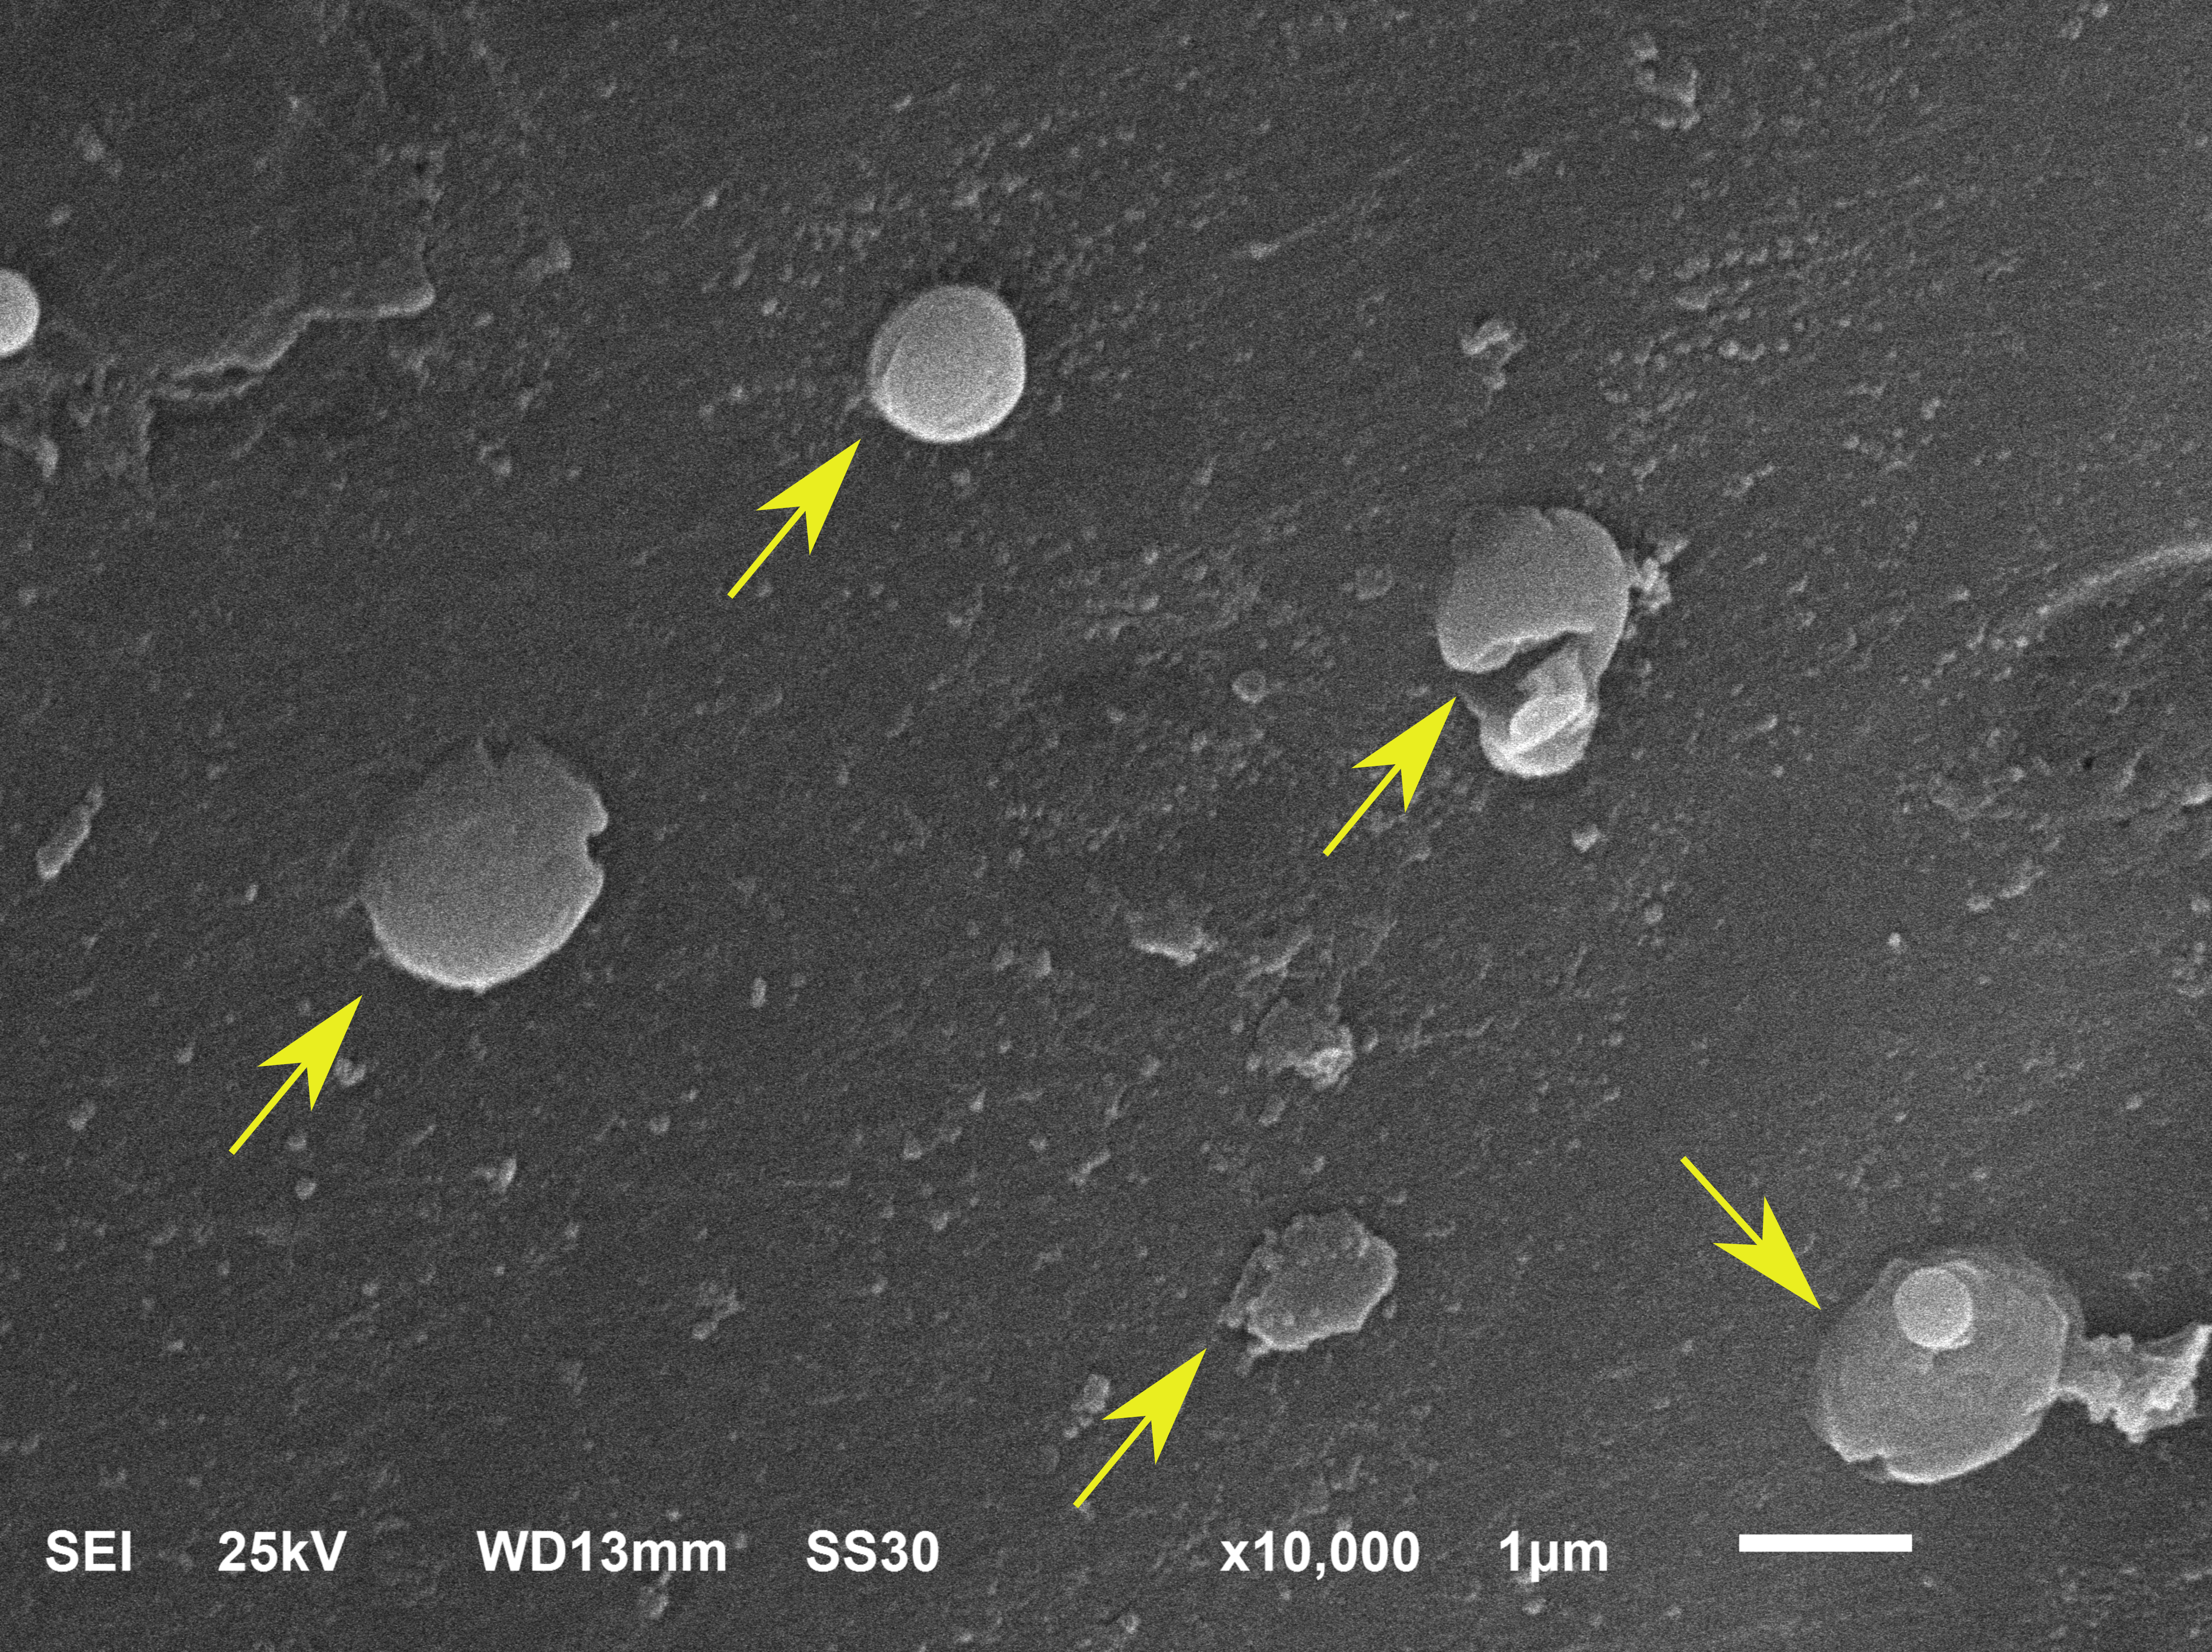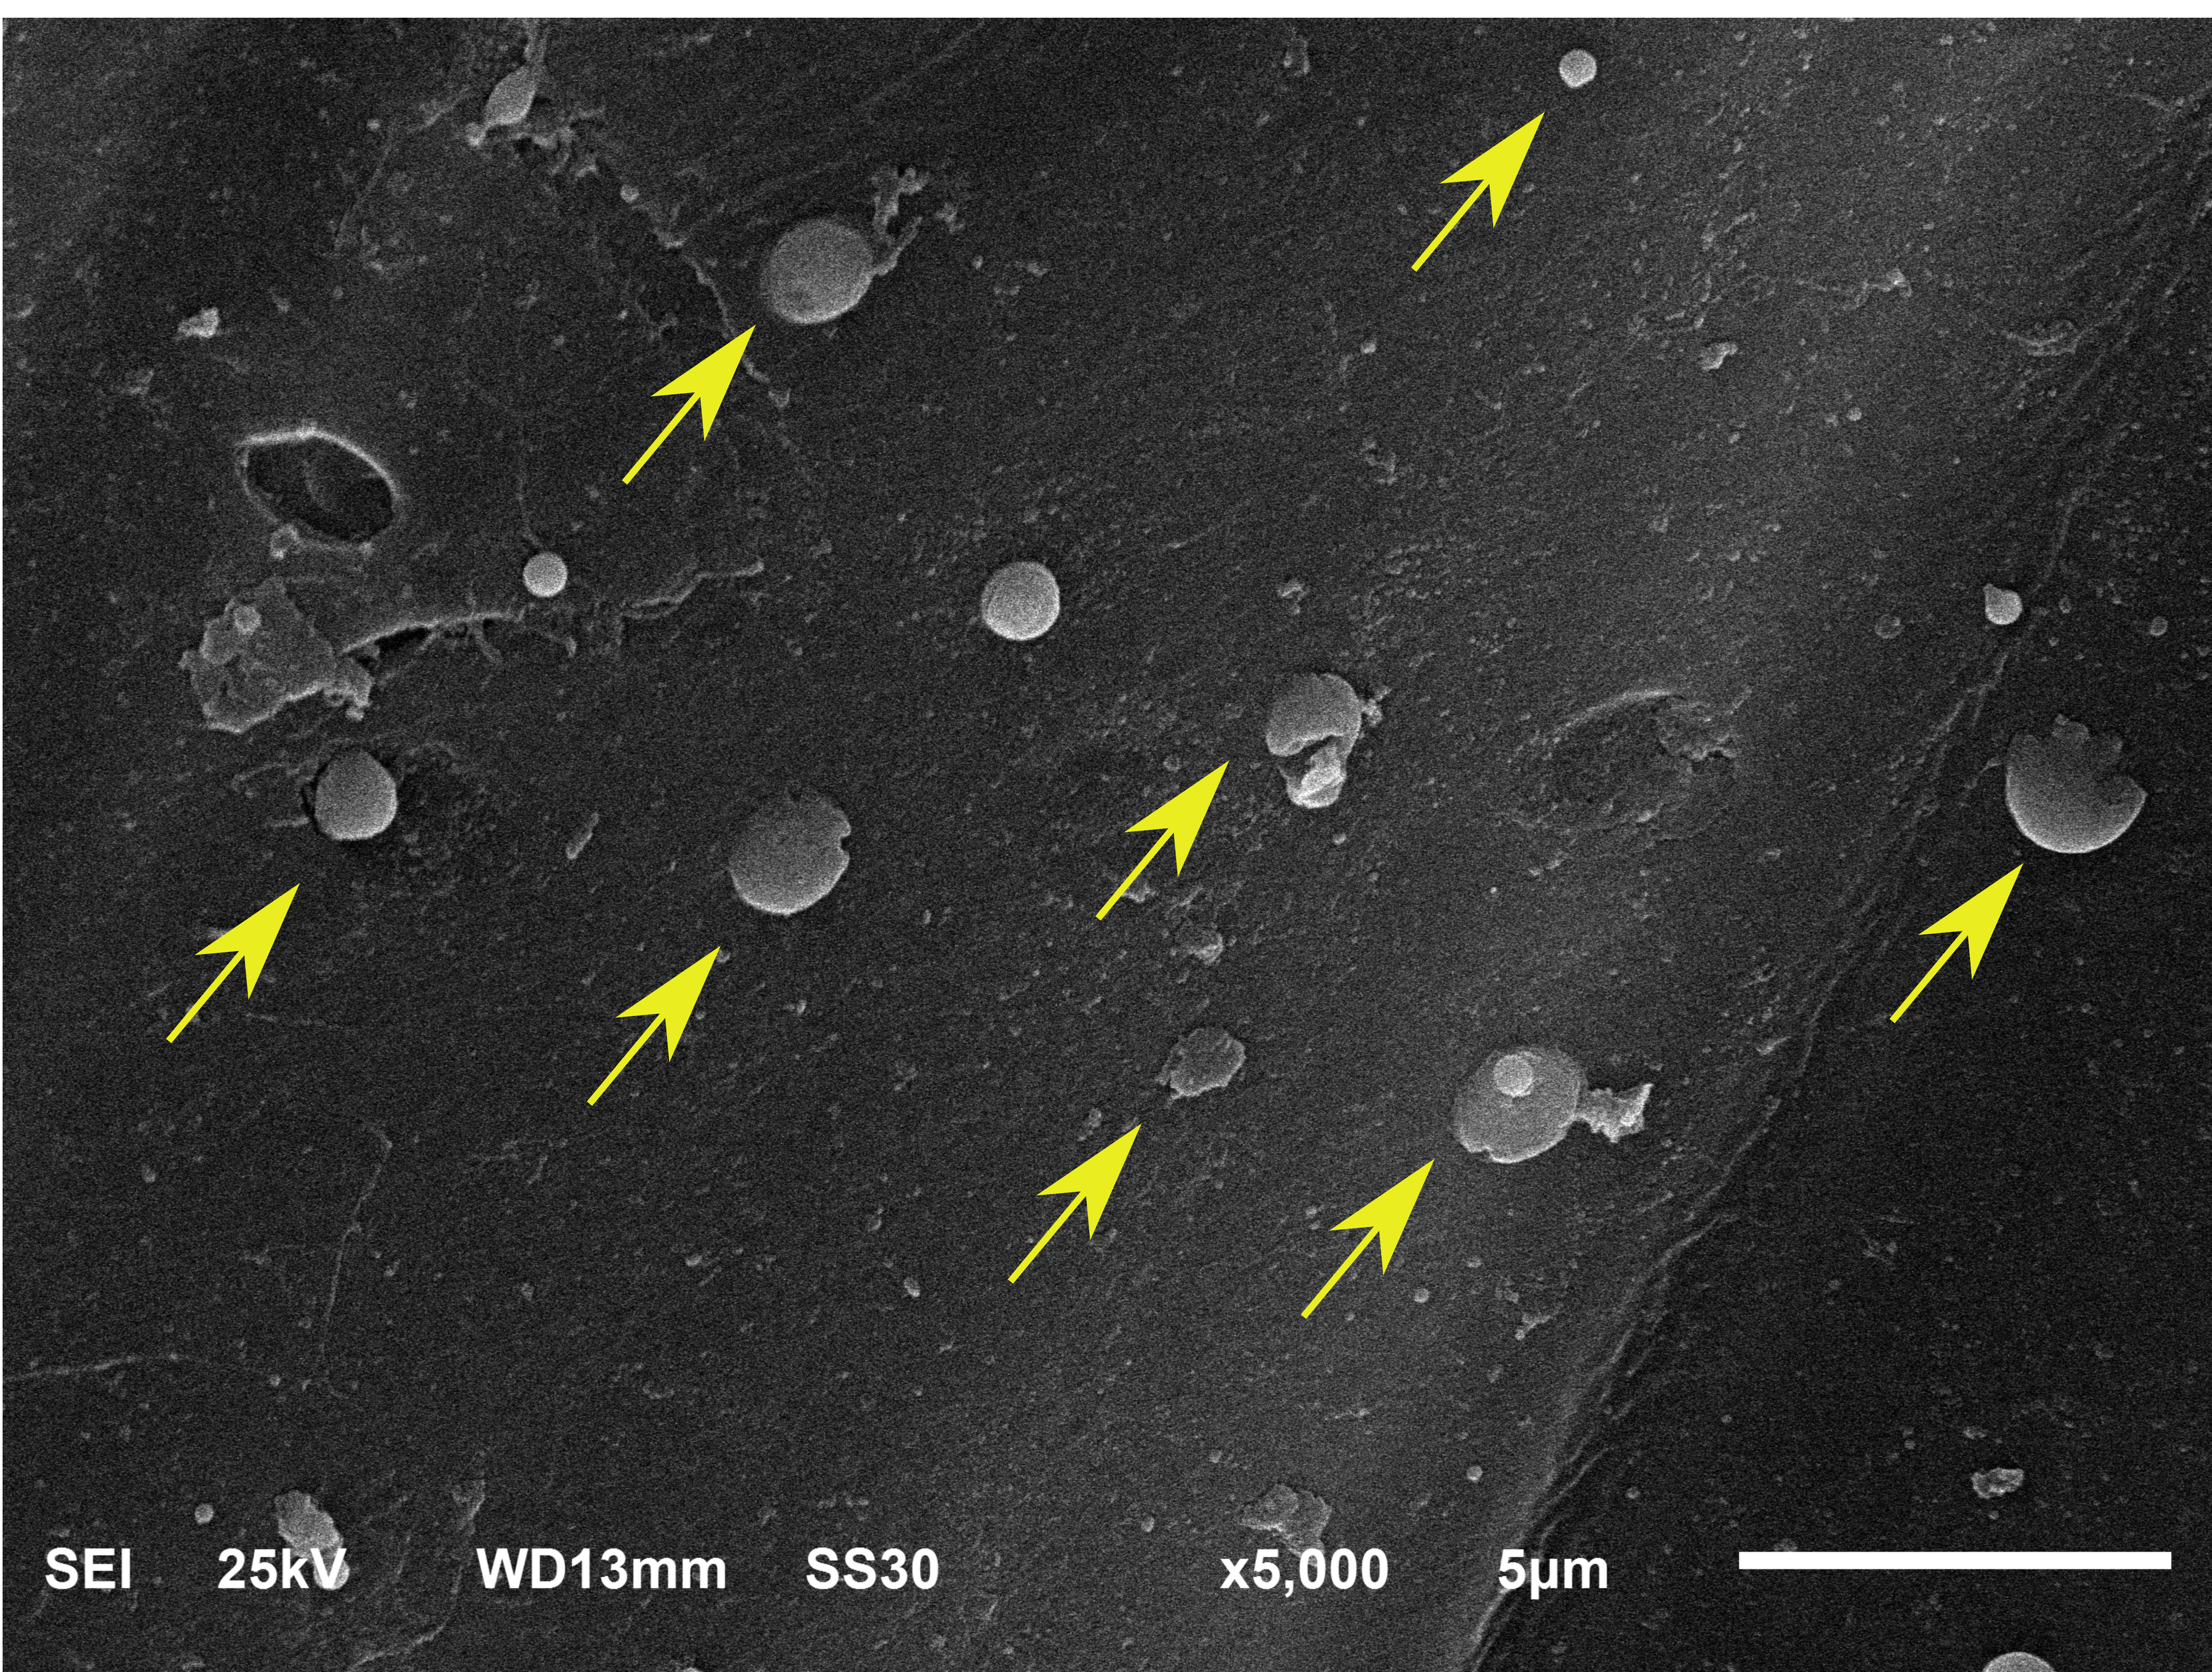

Supplement: s1 [file s1]
